# Supplementary material for: Cephalotane diterpenoids: structural diversity, biological activity, biosynthetic proposal, and chemical synthesis
Source: Royal Society of Chemistry journal article supplement (doi:10.1039/d3np00067b), 2024-01-01
Supplement: d3np00067b1.pdf [file d3np00067b1.pdf]

*Supplementary Information for*

**Cephalotane diterpenoids: structural diversity, biological activity, biosynthetic proposal, and chemical synthesis**

Jin-Xin Zhao,<sup>‡a,b</sup> Zhan-Peng Ge<sup>‡a</sup> and Jian-Min Yue<sup>\*a,b</sup>

<sup>a</sup> State Key Laboratory of Drug Research, Shanghai Institute of Materia Medica, Chinese Academy of Sciences, 555 Zuchongzhi Road, Shanghai 201203, People's Republic of China

<sup>b</sup> Shandong Laboratory of Yantai Drug Discovery, Bohai Rim Advanced Research Institute for Drug Discovery, 198 East Binhai Road, Yantai, Shandong 264117, People's Republic of China

<sup>‡</sup>These authors contributed equally.

\*Corresponding author

Tel.: +86 21 50806718. Email: [jmyue@simm.ac.cn](mailto:jmyue@simm.ac.cn).

**Table S1** Cephalotane diterpenes isolated from *Cephalotaxus* plants

| Compound                                       | Plant species                               | Plant part          | Material weight (kg) | Yield (mg/kg) | Ref. |
|------------------------------------------------|---------------------------------------------|---------------------|----------------------|---------------|------|
| Harringtonolide<br>(hainanolide, <b>1</b> )    | <i>C. harringtonia</i>                      | Seeds               | 2.5                  | 12            | 1    |
|                                                | <i>C. harringtonia</i> var. <i>drupacea</i> | Seeds               | 10                   | 75            | 2    |
|                                                | <i>C. hainanensis</i>                       | Barks               | 90                   | 9.1           | 3    |
|                                                | <i>C. lanceolata</i>                        | Branches and leaves | 9.3                  | 0.8           | 4    |
|                                                | <i>C. lanceolata</i>                        | Twigs and leaves    | 19                   | 33            | 5    |
|                                                | <i>C. fortunei</i>                          | Twigs and leaves    | 7                    | 15            | 6    |
|                                                | <i>C. fortunei</i> var. <i>alpina</i>       | Twigs and leaves    | 39                   | 5.1           | 5    |
| Fortunolide B ( <b>2</b> )                     | <i>C. fortunei</i> var. <i>alpina</i>       | Seeds               | 10                   | 300           | 7    |
|                                                | <i>C. fortunei</i> var. <i>alpina</i>       | Needles and stems   | 4.5                  | 4.7           | 8    |
|                                                | <i>C. fortunei</i> var. <i>alpina</i>       | Twigs and leaves    | 39                   | 1.9           | 5    |
|                                                | <i>C. fortunei</i> var. <i>alpina</i>       | Seeds               | 10                   | 5.0           | 9    |
|                                                | <i>C. fortunei</i>                          | Twigs and leaves    | 7                    | 0.3           | 6    |
| Cephinoid F ( <b>3</b> )                       | <i>C. sinensis</i>                          | Twigs and leaves    | 3.5                  | 2.6           | 10   |
|                                                | <i>C. lanceolata</i>                        | Twigs and leaves    | 19                   | 0.2           | 5    |
| 10-Hydroxyharringtonolide ( <b>4</b> )         | <i>C. fortunei</i> var. <i>alpina</i>       | Seeds               | 10                   | 0.4           | 7    |
|                                                | <i>C. mannii</i>                            | Twigs and leaves    | 5.2                  | 0.4           | 11   |
| Fortalpinoid J ( <b>5</b> )                    | <i>C. fortunei</i>                          | Twigs and leaves    | 7                    | 0.3           | 6    |
|                                                | <i>C. fortunei</i> var. <i>alpina</i>       | Twigs and leaves    | 39                   | 0.3           | 5    |
|                                                | <i>C. lanceolata</i>                        | Twigs and leaves    | 19                   | 2.0           | 5    |
|                                                | <i>C. fortunei</i> var. <i>alpina</i>       | Seeds               | 10                   | 1.5           | 9    |
|                                                | <i>C. fortunei</i> var. <i>alpina</i>       | Seeds               | 10                   | 0.3           | 7    |
| Cephinoid G ( <b>6</b> )                       | <i>C. fortunei</i> var. <i>alpina</i>       | Branches and leaves | 40                   | 0.1           | 12   |
|                                                | <i>C. fortunei</i> var. <i>alpina</i>       | Twigs and leaves    | 39                   | 0.6           | 5    |
| 3-Deoxyfortalpinoid F ( <b>7</b> )             | <i>C. fortunei</i> var. <i>alpina</i>       | Seeds               | 10                   | 0.8           | 7    |
| Fortalpinoid F ( <b>8</b> )                    | <i>C. fortunei</i> var. <i>alpina</i>       | Seeds               | 10                   | 0.5           | 7    |
| Cephinoid H ( <b>9</b> )                       | <i>C. fortunei</i> var. <i>alpina</i>       | Seeds               | 10                   | 0.5           | 7    |
|                                                | <i>C. lanceolata</i>                        | Twigs and leaves    | 19                   | 0.5           | 5    |
| Cephinoid I ( <b>10</b> )                      | <i>C. fortunei</i> var. <i>alpina</i>       | Branches and leaves | 40                   | 0.1           | 12   |
|                                                | <i>C. fortunei</i> var. <i>alpina</i>       | Twigs and leaves    | 39                   | 0.3           | 5    |
| Hainanolidol ( <b>11</b> )                     | <i>C. fortunei</i> var. <i>alpina</i>       | Branches and leaves | 40                   | 0.1           | 12   |
|                                                | <i>C. hainanensis</i>                       | Barks               | 90                   | 1.6           | 3    |
|                                                | <i>C. fortunei</i>                          | Twigs and leaves    | 7                    | 0.4           | 6    |
|                                                | <i>C. fortunei</i> var. <i>alpina</i>       | Needles and stems   | 4.5                  | 3.6           | 8    |
|                                                | <i>C. fortunei</i> var. <i>alpina</i>       | Twigs and leaves    | 39                   | 6.9           | 5    |
| Fortalpinoid C ( <b>12</b> )                   | <i>C. fortunei</i> var. <i>alpina</i>       | Branches and leaves | 40                   | 0.3           | 12   |
|                                                | <i>C. lanceolata</i>                        | Twigs and leaves    | 19                   | 3.2           | 5    |
|                                                | <i>C. fortunei</i> var. <i>alpina</i>       | Seeds               | 10                   | 0.2           | 7    |
| Fortunolide A ( <b>13</b> )                    | <i>C. fortunei</i> var. <i>alpina</i>       | Seeds               | 10                   | 0.2           | 7    |
|                                                | <i>C. sinensis</i>                          | Twigs and leaves    | 3.5                  | 2.6           | 10   |
|                                                | <i>C. lanceolata</i>                        | Twigs and leaves    | 19                   | 0.5           | 5    |
|                                                | <i>C. fortunei</i> var. <i>alpina</i>       | Needles and stems   | 4.5                  | 8.0           | 8    |
|                                                | <i>C. fortunei</i> var. <i>alpina</i>       | Twigs and leaves    | 39                   | 0.3           | 5    |
| Fortalpinoid A ( <b>14</b> )                   | <i>C. fortunei</i> var. <i>alpina</i>       | Seeds               | 10                   | 35            | 7    |
|                                                | <i>C. fortunei</i> var. <i>alpina</i>       | Branches and leaves | 40                   | 0.3           | 12   |
|                                                | <i>C. fortunei</i> var. <i>alpina</i>       | Seeds               | 10                   | 1.3           | 7    |
| Cephinoid J ( <b>15</b> )                      | <i>C. fortunei</i> var. <i>alpina</i>       | Twigs and leaves    | 39                   | 0.2           | 5    |
| Fortalpinoid E ( <b>16</b> )                   | <i>C. fortunei</i> var. <i>alpina</i>       | Seeds               | 10                   | 0.6           | 7    |
|                                                | <i>C. fortunei</i> var. <i>alpina</i>       | Branches and leaves | 40                   | 0.1           | 12   |
| Fortalpinoid B ( <b>17</b> )                   | <i>C. fortunei</i> var. <i>alpina</i>       | Seeds               | 10                   | 0.4           | 7    |
| 10-Hydroxyhainanolidol ( <b>18</b> )           | <i>C. fortunei</i>                          | Seeds               | 10                   | 0.4           | 7    |
|                                                | <i>C. koreana</i>                           | Aerial parts        | 1.2                  | 4.3           | 13   |
|                                                | <i>C. fortunei</i>                          | Twigs and leaves    | 7                    | 0.4           | 6    |
| 20 $\alpha$ -Hydroxyhainanolidol ( <b>19</b> ) | <i>C. fortunei</i> var. <i>alpina</i>       | Twigs and leaves    | 39                   | 0.2           | 5    |
|                                                | <i>C. fortunei</i>                          | Twigs and leaves    | 7                    | 0.4           | 6    |
| Cephinoid K ( <b>20</b> )                      | <i>C. fortunei</i> var. <i>alpina</i>       | Twigs and leaves    | 39                   | 0.3           | 5    |
|                                                | <i>C. fortunei</i> var. <i>alpina</i>       | Branches and leaves | 40                   | 0.2           | 12   |
|                                                | <i>C. lanceolata</i>                        | Twigs and leaves    | 19                   | 0.4           | 5    |

|                                                     |                                       |                     |     |     |    |
|-----------------------------------------------------|---------------------------------------|---------------------|-----|-----|----|
| Fortalpinoid D (21)                                 | <i>C. fortunei</i> var. <i>alpina</i> | Seeds               | 10  | 2.8 | 7  |
| 6-en-Harringtonolide (22)                           | <i>C. mannii</i>                      | Twigs and leaves    | 5.2 | 0.6 | 11 |
|                                                     | <i>C. fortunei</i>                    | Twigs and leaves    | 7   | 0.3 | 6  |
|                                                     | <i>C. fortunei</i> var. <i>alpina</i> | Twigs and leaves    | 39  | 0.4 | 5  |
|                                                     | <i>C. lanceolata</i>                  | Twigs and leaves    | 19  | 0.1 | 5  |
| Fortalpinoid H (23)                                 | <i>C. fortunei</i> var. <i>alpina</i> | Seeds               | 10  | 0.8 | 7  |
| Cephinoid L (24)                                    | <i>C. lanceolata</i>                  | Twigs and leaves    | 19  | 0.8 | 5  |
|                                                     | <i>C. fortunei</i> var. <i>alpina</i> | Twigs and leaves    | 39  | 0.2 | 5  |
| Cephanolide J (25)                                  | <i>C. sinensis</i>                    | Twigs and leaves    | 3.5 | 2.0 | 10 |
|                                                     | <i>C. fortunei</i> var. <i>alpina</i> | Seeds               | 10  | 0.3 | 7  |
| Fortalpinoid I (26)                                 | <i>C. fortunei</i> var. <i>alpina</i> | Seeds               | 10  | 0.1 | 7  |
| 20-Oxohainanolidol<br>(cephinoid M, 27)             | <i>C. fortunei</i>                    | Twigs and leaves    | 7   | 0.6 | 6  |
|                                                     | <i>C. fortunei</i> var. <i>alpina</i> | Twigs and leaves    | 39  | 0.6 | 5  |
|                                                     | <i>C. lanceolata</i>                  | Twigs and leaves    | 19  | 0.1 | 5  |
| Cephinoid N (28)                                    | <i>C. lanceolata</i>                  | Twigs and leaves    | 19  | 0.2 | 5  |
|                                                     | <i>C. fortunei</i> var. <i>alpina</i> | Seeds               | 10  | 0.4 | 7  |
| Fortalpinoid G (29)                                 | <i>C. fortunei</i> var. <i>alpina</i> | Seeds               | 10  | 0.1 | 7  |
| Cephinoid O (30)                                    | <i>C. lanceolata</i>                  | Twigs and leaves    | 19  | 0.1 | 5  |
|                                                     | <i>C. fortunei</i> var. <i>alpina</i> | Twigs and leaves    | 39  | 0.1 | 5  |
| Fortalpinoid M (31)                                 | <i>C. fortunei</i> var. <i>alpina</i> | Seeds               | 10  | 0.3 | 7  |
| Fortalpinoid N (32)                                 | <i>C. fortunei</i> var. <i>alpina</i> | Seeds               | 10  | 1.0 | 7  |
| Fortalpinoid O (33)                                 | <i>C. fortunei</i> var. <i>alpina</i> | Seeds               | 10  | 0.2 | 7  |
| Cephafortoid A<br>(gongshanolide, 34)               | <i>C. lanceolata</i>                  | Branches and leaves | 9.3 | 3.4 | 4  |
|                                                     | <i>C. fortunei</i>                    | Twigs and leaves    | 7   | 2.9 | 6  |
|                                                     | <i>C. fortunei</i> var. <i>alpina</i> | Twigs and leaves    | 39  | 0.4 | 5  |
|                                                     | <i>C. fortunei</i> var. <i>alpina</i> | Seeds               | 10  | 0.8 | 7  |
|                                                     | <i>C. fortunei</i> var. <i>alpina</i> | Branches and leaves | 40  | 0.1 | 12 |
| 14- <i>epi</i> -Cephafortoid A<br>(cephinoid Q, 35) | <i>C. fortunei</i>                    | Twigs and leaves    | 7   | 0.4 | 6  |
|                                                     | <i>C. lanceolata</i>                  | Twigs and leaves    | 19  | 0.9 | 5  |
|                                                     | <i>C. fortunei</i> var. <i>alpina</i> | Twigs and leaves    | 39  | 0.3 | 5  |
|                                                     | <i>C. fortunei</i> var. <i>alpina</i> | Seeds               | 10  | 0.5 | 7  |
|                                                     | <i>C. fortunei</i> var. <i>alpina</i> | Branches and leaves | 40  | 0.3 | 12 |
|                                                     | <i>C. fortunei</i> var. <i>alpina</i> | Twigs and leaves    | 39  | 0.1 | 5  |
| Cephinoid R (36)                                    | <i>C. fortunei</i> var. <i>alpina</i> | Seeds               | 10  | 0.2 | 7  |
|                                                     | <i>C. fortunei</i> var. <i>alpina</i> | Twigs and leaves    | 39  | 0.1 | 5  |
| Cephinoid S (37)                                    | <i>C. lanceolata</i>                  | Twigs and leaves    | 19  | 0.3 | 5  |
| Fortalpinoid P (38)                                 | <i>C. fortunei</i> var. <i>alpina</i> | Seeds               | 10  | 0.3 | 7  |
| Fortalpinoid Q (39)                                 | <i>C. fortunei</i> var. <i>alpina</i> | Seeds               | 10  | 0.2 | 7  |
| Cephinoid P (40)                                    | <i>C. lanceolata</i>                  | Twigs and leaves    | 19  | 0.2 | 5  |
|                                                     | <i>C. fortunei</i> var. <i>alpina</i> | Seeds               | 10  | 0.7 | 7  |
| Fortalpinoid K (41)                                 | <i>C. fortunei</i> var. <i>alpina</i> | Seeds               | 10  | 0.1 | 7  |
| Fortalpinoid L (42)                                 | <i>C. fortunei</i> var. <i>alpina</i> | Seeds               | 10  | 0.1 | 7  |
| Ceforloid B (43)                                    | <i>C. fortunei</i> var. <i>alpina</i> | Seeds               | 10  | 0.8 | 14 |
| Ceforloid C (44)                                    | <i>C. sinensis</i>                    | Twigs and leaves    | 8.0 | 0.4 | 14 |
| Mannolide A (45)                                    | <i>C. mannii</i>                      | Twigs and leaves    | 5.2 | 1.9 | 11 |
|                                                     | <i>C. fortunei</i>                    | Twigs and leaves    | 7   | 0.4 | 6  |
|                                                     | <i>C. fortunei</i> var. <i>alpina</i> | Seeds               | 10  | 0.4 | 15 |
| Mannolide B (46)                                    | <i>C. mannii</i>                      | Twigs and leaves    | 5.2 | 0.4 | 11 |
|                                                     | <i>C. fortunei</i> var. <i>alpina</i> | Seeds               | 10  | 0.2 | 15 |
| Mannolide C (47)                                    | <i>C. mannii</i>                      | Twigs and leaves    | 5.2 | 0.6 | 11 |
| Fortalide A (48)                                    | <i>C. fortunei</i> var. <i>alpina</i> | Seeds               | 10  | 0.6 | 15 |
| Fortalide B (49)                                    | <i>C. fortunei</i> var. <i>alpina</i> | Seeds               | 10  | 0.7 | 15 |
| Cephanolide G (50)                                  | <i>C. sinensis</i>                    | Twigs and leaves    | 3.5 | 1.4 | 10 |
| Cephanolide F (51)                                  | <i>C. sinensis</i>                    | Twigs and leaves    | 3.5 | 2.0 | 10 |
| Fortalide C (52)                                    | <i>C. fortunei</i> var. <i>alpina</i> | Seeds               | 10  | 0.2 | 15 |
| Fortalide D (53)                                    | <i>C. fortunei</i> var. <i>alpina</i> | Seeds               | 10  | 1.2 | 15 |
| Fortalide E (54)                                    | <i>C. fortunei</i> var. <i>alpina</i> | Seeds               | 10  | 0.2 | 15 |
| Fortalide F (55)                                    | <i>C. fortunei</i> var. <i>alpina</i> | Seeds               | 10  | 0.1 | 15 |
| Cephanolide E (56)                                  | <i>C. sinensis</i>                    | Twigs and leaves    | 3.5 | 2.9 | 10 |

|                        |                                       |                     |      |     |    |
|------------------------|---------------------------------------|---------------------|------|-----|----|
|                        | <i>C. fortunei</i> var. <i>alpina</i> | Branches and leaves | 40   | 0.1 | 12 |
|                        | <i>C. fortunei</i> var. <i>alpina</i> | Seeds               | 10   | 0.8 | 15 |
| Fortalide G (57)       | <i>C. fortunei</i> var. <i>alpina</i> | Seeds               | 10   | 0.6 | 15 |
| Fortalide H (58)       | <i>C. fortunei</i> var. <i>alpina</i> | Seeds               | 10   | 0.7 | 15 |
| Fortalide I (59)       | <i>C. fortunei</i> var. <i>alpina</i> | Seeds               | 10   | 0.1 | 15 |
| Cephinoid B (60)       | <i>C. fortunei</i> var. <i>alpina</i> | Twigs and leaves    | 39   | 0.1 | 5  |
|                        | <i>C. fortunei</i> var. <i>alpina</i> | Seeds               | 10   | 0.9 | 15 |
| Cephinoid A (61)       | <i>C. fortunei</i> var. <i>alpina</i> | Twigs and leaves    | 39   | 0.5 | 5  |
|                        | <i>C. fortunei</i> var. <i>alpina</i> | Seeds               | 10   | 1.2 | 15 |
| Fortalide J (62)       | <i>C. fortunei</i> var. <i>alpina</i> | Seeds               | 10   | 1.1 | 15 |
| Fortalide K (63)       | <i>C. fortunei</i> var. <i>alpina</i> | Seeds               | 10   | 0.1 | 15 |
| Fortalide L (64)       | <i>C. fortunei</i> var. <i>alpina</i> | Seeds               | 10   | 0.4 | 15 |
| Fortalide M (65)       | <i>C. fortunei</i> var. <i>alpina</i> | Seeds               | 10   | 0.2 | 15 |
| Fortalpinoid R (66)    | <i>C. fortunei</i> var. <i>alpina</i> | Twigs               | 20.0 | 0.1 | 16 |
| Cephinoid C (67)       | <i>C. lanceolata</i>                  | Twigs and leaves    | 19   | 2.0 | 5  |
| Cephinoid D (68)       | <i>C. fortunei</i> var. <i>alpina</i> | Twigs and leaves    | 39   | 0.2 | 5  |
| Cephinoid E (69)       | <i>C. fortunei</i> var. <i>alpina</i> | Twigs and leaves    | 39   | 0.1 | 5  |
| Fortalide N (70)       | <i>C. fortunei</i> var. <i>alpina</i> | Seeds               | 10   | 0.2 | 15 |
| Fortalide O (71)       | <i>C. fortunei</i> var. <i>alpina</i> | Seeds               | 10   | 0.2 | 15 |
| Cephafortunoid C (72)  | <i>C. fortunei</i> var. <i>alpina</i> | Branches and leaves | 40   | 0.2 | 12 |
| Cephafortunoid D (73)  | <i>C. fortunei</i> var. <i>alpina</i> | Branches and leaves | 40   | 0.2 | 12 |
| Fortalide P (74)       | <i>C. fortunei</i> var. <i>alpina</i> | Seeds               | 10   | 0.3 | 15 |
| Fortalide Q (75)       | <i>C. fortunei</i> var. <i>alpina</i> | Seeds               | 10   | 0.2 | 15 |
| Cephanolide H (76)     | <i>C. sinensis</i>                    | Twigs and leaves    | 3.5  | 1.1 | 10 |
| Cephanolide I (77)     | <i>C. sinensis</i>                    | Twigs and leaves    | 3.5  | 0.6 | 10 |
| Ceforloid G (78)       | <i>C. sinensis</i>                    | Twigs and leaves    | 8.0  | 0.3 | 14 |
| Cephasinenoside A (79) | <i>C. sinensis</i>                    | Twigs and leaves    | 43   | 0.3 | 17 |
|                        | <i>C. sinensis</i>                    | Twigs and leaves    | 8.0  | 0.5 | 14 |
| Ceforloid F (80)       | <i>C. sinensis</i>                    | Twigs and leaves    | 8.0  | 0.3 | 14 |
| Ceforloid D (81)       | <i>C. fortunei</i> var. <i>alpina</i> | Seeds               | 10   | 0.4 | 14 |
| Ceforloid E (82)       | <i>C. fortunei</i> var. <i>alpina</i> | Seeds               | 10   | 0.2 | 14 |
| Cephafortunoid A (83)  | <i>C. fortunei</i> var. <i>alpina</i> | Branches and leaves | 40   | 0.1 | 12 |
| Cephafortunoid B (84)  | <i>C. fortunei</i> var. <i>alpina</i> | Branches and leaves | 40   | 0.1 | 12 |
| Cephanolide D (85)     | <i>C. sinensis</i>                    | Twigs and leaves    | 3.5  | 1.4 | 10 |
| Ceforalide A (86)      | <i>C. fortunei</i> var. <i>alpina</i> | Seeds               | 10   | 0.6 | 18 |
| Ceforalide B (87)      | <i>C. fortunei</i> var. <i>alpina</i> | Seeds               | 10   | 0.1 | 18 |
| Ceforalide C (88)      | <i>C. fortunei</i> var. <i>alpina</i> | Seeds               | 10   | 0.4 | 18 |
| Cephanolide C (89)     | <i>C. sinensis</i>                    | Twigs and leaves    | 3.5  | 2.3 | 10 |
| Cephanolide B (90)     | <i>C. sinensis</i>                    | Twigs and leaves    | 3.5  | 1.7 | 10 |
| Ceforalide D (91)      | <i>C. fortunei</i> var. <i>alpina</i> | Seeds               | 10   | 0.2 | 18 |
| Ceforalide E (92)      | <i>C. fortunei</i> var. <i>alpina</i> | Seeds               | 10   | 0.1 | 18 |
| Ceforalide F (93)      | <i>C. fortunei</i> var. <i>alpina</i> | Seeds               | 10   | 0.2 | 18 |
| Ceforalide G (94)      | <i>C. fortunei</i> var. <i>alpina</i> | Seeds               | 10   | 0.1 | 18 |
| Cephanolide A (95)     | <i>C. sinensis</i>                    | Twigs and leaves    | 3.5  | 2.3 | 10 |
| Ceforalide H (96)      | <i>C. fortunei</i> var. <i>alpina</i> | Seeds               | 10   | 0.9 | 18 |
| Ceforloid A (97)       | <i>C. fortunei</i> var. <i>alpina</i> | Seeds               | 10   | 0.3 | 14 |
| Cephalotanin A (98)    | <i>C. sinensis</i>                    | Leaves              | 4.0  | 1.3 | 19 |
| Cephalotanin B (99)    | <i>C. sinensis</i>                    | Leaves              | 4.0  | 2.5 | 19 |
| Ceforalide I (100)     | <i>C. fortunei</i> var. <i>alpina</i> | Seeds               | 10   | 0.2 | 18 |
| Cephalotanin C (101)   | <i>C. sinensis</i>                    | Leaves              | 4.0  | 0.5 | 19 |
|                        | <i>C. lanceolata</i>                  | Twigs and leaves    | 19   | 0.1 | 5  |
| Cephalotanin D (102)   | <i>C. sinensis</i>                    | Leaves              | 4.0  | 2.5 | 19 |
| Cephalodione A (103)   | <i>C. fortunei</i> var. <i>alpina</i> | Seeds               | 10   | 0.3 | 9  |
| Cephalodione B (104)   | <i>C. fortunei</i> var. <i>alpina</i> | Seeds               | 10   | 0.1 | 9  |
| Cephalodione C (105)   | <i>C. fortunei</i> var. <i>alpina</i> | Seeds               | 10   | 0.2 | 9  |
| Cephalodione D (106)   | <i>C. fortunei</i> var. <i>alpina</i> | Seeds               | 10   | 0.3 | 9  |

## References

1. J. G. Buta, J. L. Flippen and W. R. Lusby, *J. Org. Chem.*, 1978, **43**, 1002–1003.
2. L. Evanno, A. Jossang, J. Nguyen-Pouplin, D. Delaroche, P. Herson, M. Seuleiman, B. Bodo and B. Nay, *Planta Med.*, 2008, **74**, 870–872.
3. N.-J. Sun, Z. Xue, X.-T. Liang and L. Huang, *Acta Pharm. Sin.*, 1979, **14**, 39–44.
4. Y.-R. He, Y.-H. Shen, L. Shan, X. Yang, B. Wen, J. Ye, X. Yuan, H.-L. Li, X.-K. Xu and W.-D. Zhang, *RSC Adv.*, 2015, **5**, 4126–4134.
5. L. Ni, X.-H. Zhong, X.-J. Chen, B.-J. Zhang, M.-F. Bao and X.-H. Cai, *Phytochemistry*, 2018, **151**, 50–60.
6. J.-X. Zhao, Y.-Y. Fan, J.-B. Xu, L.-S. Gan, C.-H. Xu, J. Ding and J.-M. Yue, *J. Nat. Prod.*, 2017, **80**, 356–362.
7. Z.-P. Ge, H.-C. Liu, G.-C. Wang, Q.-F. Liu, C.-H. Xu, J. Ding, Y.-Y. Fan and J.-M. Yue, *J. Nat. Prod.*, 2019, **82**, 1565–1575.
8. J. Du, M.-H. Chiu and R. L. Nie, *J. Nat. Prod.*, 1999, **62**, 1664–1665.
9. Z.-P. Ge, Y.-Y. Fan, W.-D. Deng, C.-Y. Zheng, T. Li and J.-M. Yue, *Angew. Chem. Int. Ed.*, 2021, **60**, 9374–9378.
10. Y.-Y. Fan, J.-B. Xu, H.-C. Liu, L.-S. Gan, J. Ding and J.-M. Yue, *J. Nat. Prod.*, 2017, **80**, 3159–3166.
11. G. Ni, H. Zhang, Y.-Y. Fan, H.-C. Liu, J. Ding and J.-M. Yue, *Org. Lett.*, 2016, **18**, 1880–1883.
12. Y. Li, Y. Wang, Z. Shao, C. Zhao, Q. Jing, D. Li, B. Lin, Y. Jing, Z. Li and H. Hua, *Bioorg. Chem.*, 2020, **103**, 104226.
13. K. D. Yoon, D. G. Jeong, Y. H. Hwang, J. M. Ryu and J. Kim, *J. Nat. Prod.*, 2007, **70**, 2029–2032.
14. Z.-P. Ge, J.-B. Xu, P. Zhao, M. Xiang, Y. Zhou, Z.-M. Lin, J.-P. Zuo, J.-X. Zhao and J.-M. Yue, *Phytochemistry*, 2024, DOI: 10.1016/j.phytochem.2024.114038.
15. Z.-P. Ge, B. Zhou, F. M. Zimbres, R. S. Haney, Q.-F. Liu, Y. Wu, M. B. Cassera, J.-X. Zhao and J.-M. Yue, *Org. Biomol. Chem.*, 2022, **20**, 9000–9009.
16. Q.-P. Huang, K. Guo, Y. Liu, Y.-C. Liu, W.-Y. Li, H. Geng, Y. Wang and S.-H. Li, *Chem. Biodivers.*, 2020, **17**, e2000210.
17. C.-X. Zhao, B.-Q. Li, Z.-X. Shao, D.-H. Li, Y.-K. Jing, Z.-L. Li and H.-M. Hua, *Tetrahedron Lett.*, 2019, **60**, 151154.
18. Z.-P. Ge, B. Zhou, F. M. Zimbres, M. B. Cassera, J.-X. Zhao and J.-M. Yue, *Chin. J. Chem.*, 2022, **40**, 1177–1184.
19. J.-B. Xu, Y.-Y. Fan, L.-S. Gan, Y.-B. Zhou, J. Li and J.-M. Yue, *Chem. Eur. J.*, 2016, **22**, 14648–14654.
